# Supplementary material
Source: Springer Nature journal article supplement (https://www.springermedizin.de/resource/supplementary/12889_2011_3763_MOESM5_ESM.pdf/9489740)
Supplement: MOESM5 [file 9489740]

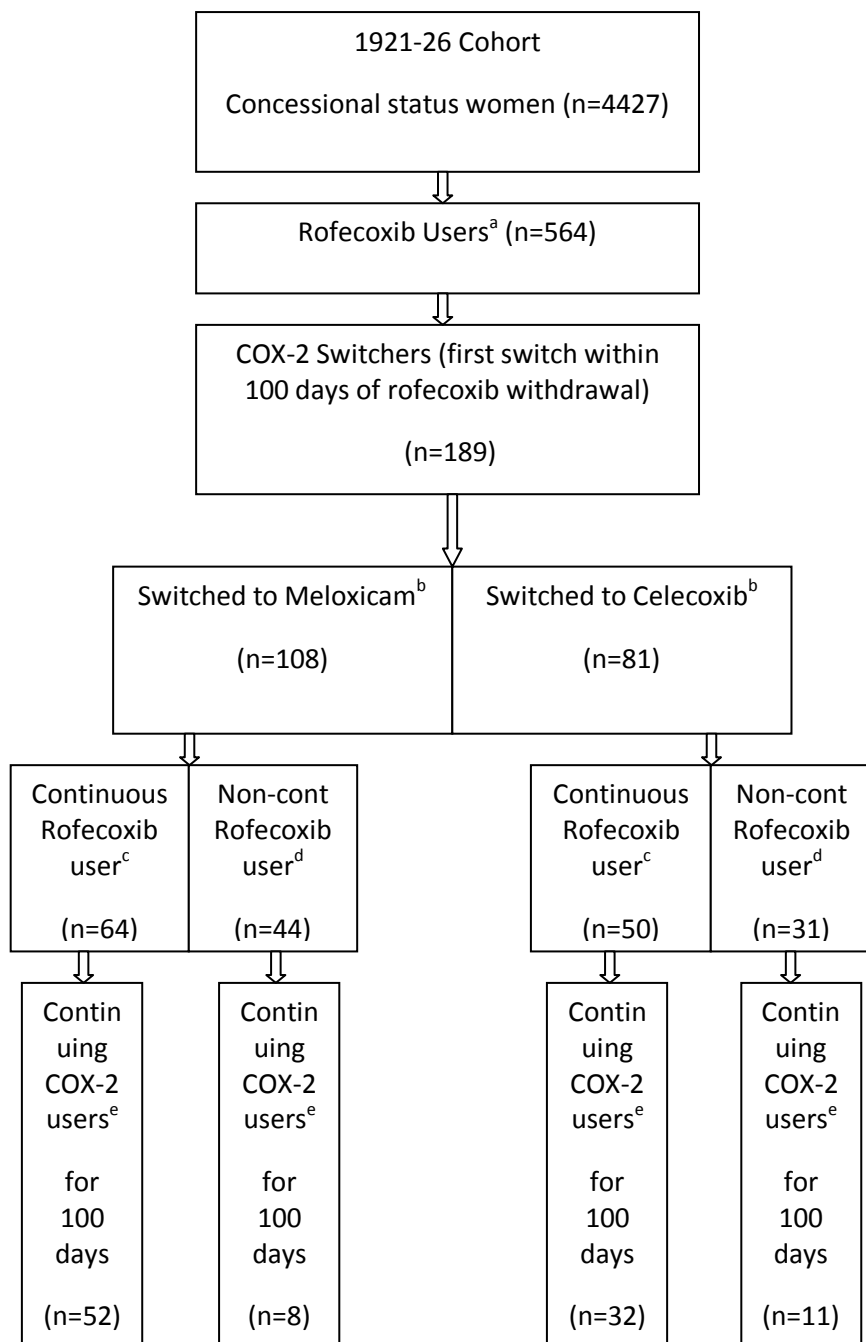

- a. One or more rofecoxib prescriptions dispensed in 12 months before rofecoxib withdrawal (30 September 2003 to 30 September 2004).
- b. First medicine switch within 100 days of rofecoxib withdrawal.
- c. Nine or more rofecoxib prescriptions dispensed in 12 months before rofecoxib withdrawal.
- d. Eight or less rofecoxib prescriptions dispensed in 12 months before rofecoxib withdrawal.
- e. Two or more COX-2 prescriptions dispensed in 100 days from first COX-2 prescription after rofecoxib withdrawal.
